# Supplementary material for: Comparative physiological, metabolomic, and transcriptomic analyses reveal mechanisms of improved abiotic stress resistance in bermudagrass [Cynodon dactylon (L). Pers.] by exogenous melatonin
Source: PubMed Central journal article supplement (PMC4321537; doi:10.1093/jxb/eru373), 2014-09-15
Supplement: supp_eru373_jexbot132589_file002.pdf [file supp_eru373_jexbot132589_file002.pdf]

**Comparative physiological, metabolomic and transcriptomic analyses reveal mechanisms of improved abiotic stress resistance in bermudagrass (*Cynodon dactylon* (L). Pers.) by exogenous melatonin**

*Haitao Shi, Chuan Jiang, Tiantian Ye, Dunxian Tan, Russel J Reiter, Heng Zhang, Renyi Liu, and Zhulong Chan*

**SUPPLEMENTARY DATA**

**Table S1.** The specific primers used for real-time PCR.

**Table S2.** Concentrations of 54 metabolites in 28-day-old bermudagrass plants after different treatments (control or 20  $\mu$ M melatonin) under control, 300 mM NaCl, drought, and cold (4°C) stress conditions for 14 days. The concentrations of metabolites are expressed as  $\mu\text{g}\cdot\text{g}^{-1}$  FW. Three biological replicates were used for each group.

**Table S3.** Summary of RNA-Seq data.

**Table S4.** List of up-regulated genes in melatonin-treated bermudagrass plants.

**Table S5.** List of down-regulated genes in melatonin-treated bermudagrass plants.

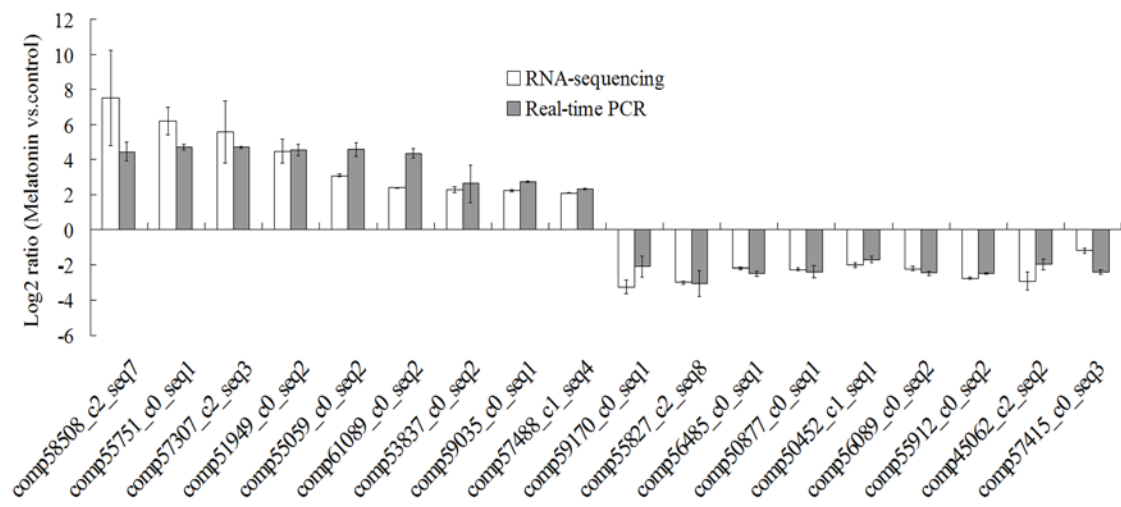

**Figure S1.** Validation of differentially expressed genes by quantitative real-time PCR.

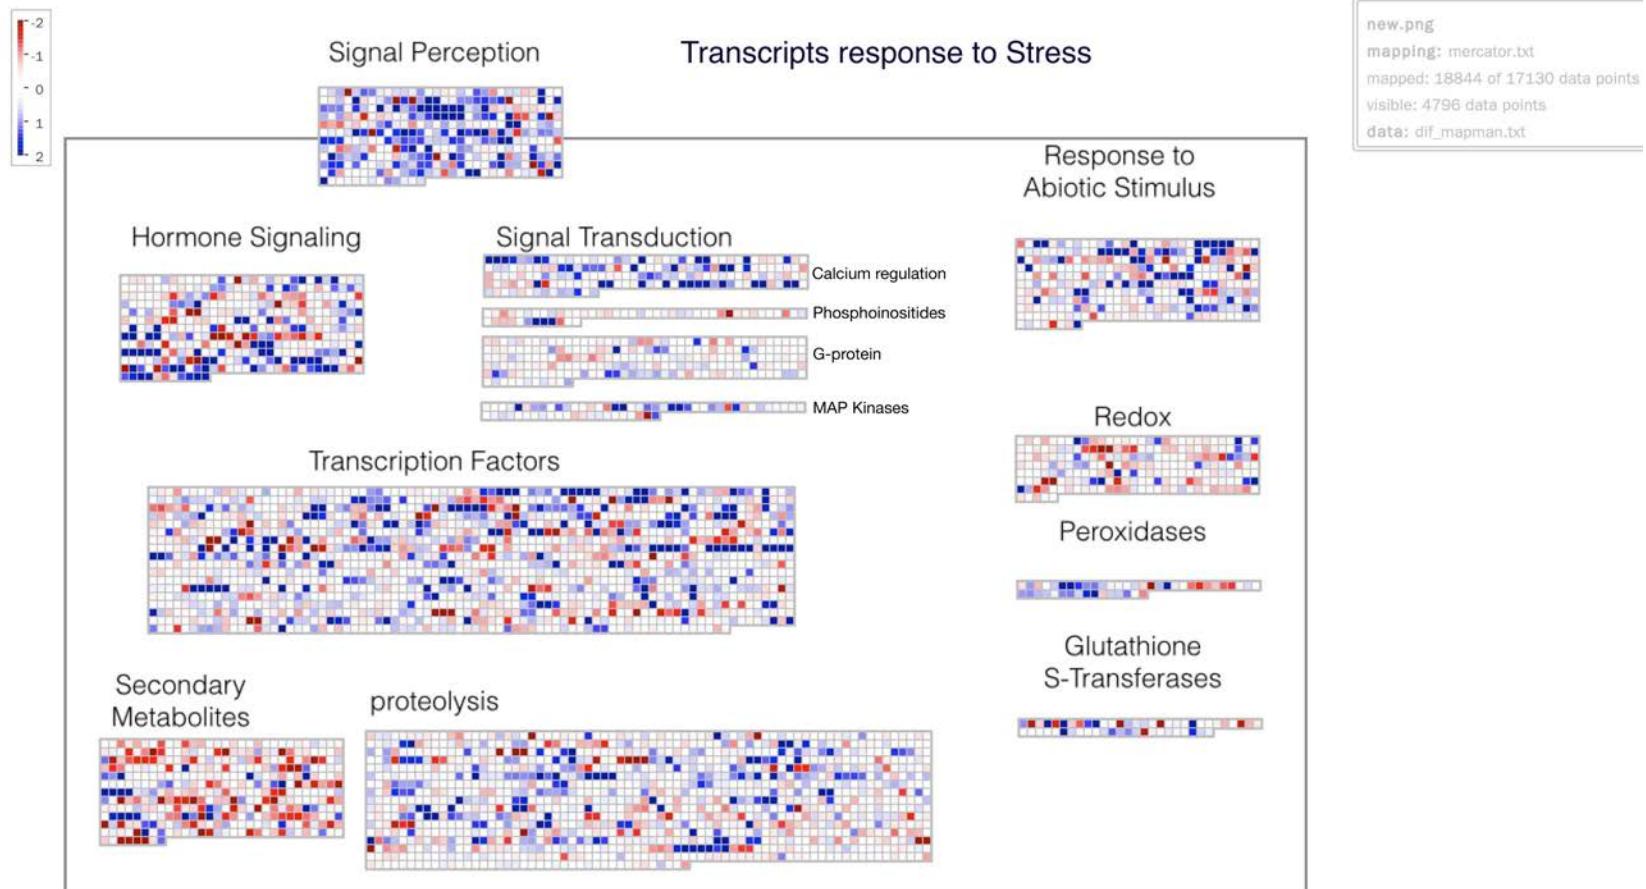

**Figure S2.** Effect of exogenous melatonin treatment on stress-related pathways in bermudagrass. Transcripts participate in the same pathway or homologs were represented by a set of closely-connected cubes, and the 2 based logarithm of fold change value ( $\log_2$ FC) were denoted by colors.
